# Supplementary material for: HPV DeepSeq: Ultra-Fast Method of NGS Data Analysis and Visualization Using Automated Workflows and a Customized Papillomavirus Database in CLC Genomics Workbench
Source: Preprints.org preprint supplement (doi:10.20944/preprints202108.0149.v1), 2021-08-06
Supplement: Supplementary file 1 [file supplementary]

**Supplementary Table 2** HPV E6/E7 Sanger and deep sequencing results

| Sample Info <sup>a</sup> |         |      | Seq <sup>b</sup> | Deep Sequencing <sup>c</sup> |                        |                                                         |              |        |        |        |        |        |      |      |      |      |      |      |
|--------------------------|---------|------|------------------|------------------------------|------------------------|---------------------------------------------------------|--------------|--------|--------|--------|--------|--------|------|------|------|------|------|------|
|                          |         |      |                  | Reads Info <sup>d</sup>      |                        | HPV genotypes and proportional composition <sup>e</sup> |              |        |        |        |        |        |      |      |      |      |      |      |
|                          |         |      |                  | Total Merged Reads (n)       | Total Mapped Reads (n) | HPV Type (n)                                            | HPV #1       | HPV #2 | HPV #3 | HPV #4 | HPV #5 | HPV #6 | p #1 | p #2 | p #3 | p #4 | p #5 | p #6 |
| PC_2994                  | P11_A1  | LSIL | 39 A2            | 88,812                       | 42,478                 | 5                                                       | 39 A         | 35     | 52     | 16     | 91     |        | 0.62 | 0.32 | 0.03 | 0.02 | 0.02 |      |
| PC_3002                  | P11_A2  | LSIL | 35 A2            | 434,264                      | 325,254                | 3                                                       | 35 A1,2      | 39     | 52     |        |        |        | 0.96 | 0.03 | 0.01 |      |      |      |
| PC_3010                  | P11_A3  | LSIL | 39 A2            | 592,196                      | 451,184                | 4                                                       | 39 A         | 52     | 91     | 35     |        |        | 0.71 | 0.26 | 0.02 | 0.01 |      |      |
| PC_3018                  | P11_A4  | LSIL | 91               | 255,520                      | 187,892                | 2                                                       | 91           | 39     |        |        |        |        | 0.93 | 0.07 |      |      |      |      |
| PC_3042                  | P11_A5  | LSIL | 39 A2            | 104,718                      | 32,356                 | 2                                                       | 39 A         | 16     |        |        |        |        | 0.99 | 0.01 |      |      |      |      |
| PC_3050                  | P11_A6  | LSIL | 39 A2            | 301,906                      | 237,922                | 1                                                       | 39 A         |        |        |        |        |        | 1.00 |      |      |      |      |      |
| PC_3058                  | P11_A7  | LSIL | 39 A2            | 201,850                      | 153,368                | 2                                                       | 39 A         | 62     |        |        |        |        | 0.99 | 0.01 |      |      |      |      |
| PC_3066                  | P11_A8  | LSIL | 39 A2            | 404,354                      | 313,146                | 2                                                       | 39 A         | 91     |        |        |        |        | 0.97 | 0.03 |      |      |      |      |
| PC_3074                  | P11_A9  | LSIL | 91               | 353,110                      | 261,928                | 4                                                       | 91           | 39     | 43     | 54     |        |        | 0.75 | 0.12 | 0.10 | 0.02 |      |      |
| PC_3082                  | P11_A10 | LSIL | 66 B1*           | 37,944                       | 24,160                 | 5                                                       | 66 B1        | 39     | 35     | 16     | 62     |        | 0.53 | 0.36 | 0.06 | 0.04 | 0.01 |      |
| PC_3003                  | P11_A11 | LSIL | 66 B1            | 71,374                       | 26,432                 | 6                                                       | 66 B1        | 35     | 84     | 16     | 54     | 62     | 0.50 | 0.18 | 0.17 | 0.06 | 0.04 | 0.04 |
| PC_3011                  | P11_A12 | LSIL | 35 A2            | 388,530                      | 297,058                | 5                                                       | 35 A1,2      | 62     | 66     | 16     | 54     |        | 0.74 | 0.14 | 0.05 | 0.04 | 0.02 |      |
| PC_3019                  | P11_B1  | LSIL | 16 A1            | 640,246                      | 495,266                | 2                                                       | 16 A1        | 39     |        |        |        |        | 0.99 | 0.01 |      |      |      |      |
| PC_3059                  | P11_B2  | LSIL | 39 A2            | 283,076                      | 190,446                | 3                                                       | 39 A         | 62     | 16     |        |        |        | 0.74 | 0.25 | 0.01 |      |      |      |
| PC_3067                  | P11_B3  | LSIL | 16 A1            | 144,894                      | 79,200                 | 5                                                       | 16 A1        | 68     | 39     | 43     | 82     |        | 0.90 | 0.04 | 0.03 | 0.01 | 0.01 |      |
| PC_3075                  | P11_B4  | LSIL | 16 A1            | 265,916                      | 216,072                | 3                                                       | 16 A1        | 43     | 39     |        |        |        | 0.54 | 0.41 | 0.06 |      |      |      |
| PC_3083                  | P11_B5  | LSIL | 58 C1            | 202,370                      | 130,742                | 3                                                       | 58 C1        | 43     | 39     |        |        |        | 0.72 | 0.26 | 0.01 |      |      |      |
| PC_2996                  | P11_B6  | LSIL | 62               | 85,356                       | 12,134                 | 6                                                       | 62           | 30     | 61     | 39     | 51     | 54     | 0.61 | 0.23 | 0.07 | 0.04 | 0.02 | 0.02 |
| PC_3004                  | P11_B7  | LSIL | 30 A3            | 229,388                      | 150,402                | 3                                                       | 30 A         | 54     | 39     |        |        |        | 0.92 | 0.07 | 0.01 |      |      |      |
| PC_3020                  | P11_B8  | LSIL | 30 A3            | 232,398                      | 106,562                | 4                                                       | 30 A2        | 39     | 51     | 89     |        |        | 0.54 | 0.42 | 0.03 | 0.01 |      |      |
| PC_3028                  | P11_B9  | LSIL | 51               | 447,206                      | 288,514                | 2                                                       | 51 B1        | 89     |        |        |        |        | 0.81 | 0.19 |      |      |      |      |
| PC_3036                  | P11_B10 | LSIL | 16 A1            | 124,796                      | 59,988                 | 2                                                       | 16 A1        | 39     |        |        |        |        | 0.87 | 0.13 |      |      |      |      |
| PC_3044                  | P11_B11 | LSIL | 39 A2            | 315,946                      | 238,710                | 2                                                       | 39 A         | 68     |        |        |        |        | 0.99 | 0.01 |      |      |      |      |
| PC_3060                  | P11_B12 | LSIL | 39 A2            | 620,642                      | 492,650                | 2                                                       | 39 A         | 58     |        |        |        |        | 0.99 | 0.01 |      |      |      |      |
| PC_3076                  | P11_C1  | LSIL | 39 A2            | 64,626                       | 15,778                 | 4                                                       | 39 A         | 62     | 16     | 89     |        |        | 0.77 | 0.20 | 0.02 |      |      |      |
| PC_3084                  | P11_C2  | LSIL | 39 A2            | 611,624                      | 470,370                | 3                                                       | 39 A         | 62     | 89     |        |        |        | 0.77 | 0.20 | 0.02 |      |      |      |
| PC_3005                  | P11_C3  | LSIL | <b>53 A1*</b>    | 82,078                       | 20,962                 | 5                                                       | <b>16 A2</b> | 39     | 43     | 84     | 66     |        | 0.47 | 0.36 | 0.14 | 0.02 | 0.01 |      |
| PC_3013                  | P11_C4  | LSIL | 39 A2            | 608,524                      | 459,216                | 4                                                       | 39 A         | 43     | 84     | 81     |        |        | 0.69 | 0.27 | 0.03 | 0.01 |      |      |
| PC_3029                  | P11_C5  | LSIL | 66 A1            | 201,624                      | 73,564                 | 3                                                       | 66 A1        | 16     | 54     |        |        |        | 0.96 | 0.02 | 0.01 |      |      |      |
| PC_3061                  | P11_C6  | LSIL | 16 C1            | 175,128                      | 96,092                 | 4                                                       | 16 C1        | 52     | 89     | 56     |        |        | 0.96 | 0.02 | 0.01 | 0.01 |      |      |
| PC_3069                  | P11_C7  | LSIL | 52 A1            | 106,440                      | 50,024                 | 5                                                       | 52 A1        | 81     | 16     | 54     | 35     |        | 0.87 | 0.04 | 0.04 | 0.04 | 0.01 |      |
| PC_3085                  | P11_C8  | LSIL | 54 A1            | 172,584                      | 107,672                | 4                                                       | 54 A1        | 35     | 74     | 39     |        |        | 0.96 | 0.02 | 0.01 | 0.01 |      |      |
| PC_2998                  | P11_C9  | LSIL | 35 A2            | 253,604                      | 168,400                | 4                                                       | 35 A1,2      | 39     | 43     | 16     |        |        | 0.93 | 0.04 | 0.02 | 0.01 |      |      |
| PC_3006                  | P11_C10 | LSIL | 16 A2            | 201,574                      | 116,266                | 1                                                       | 16 A1,2      |        |        |        |        |        | 1.00 |      |      |      |      |      |
| PC_3014                  | P11_C11 | LSIL | <b>53 A1*</b>    | 132,216                      | 13,684                 | 4                                                       | <b>39 A</b>  | 16     | 62     | 89     |        |        | 0.66 | 0.16 | 0.16 | 0.02 |      |      |
| PC_3030                  | P11_C12 | LSIL | 16 A1            | 300,230                      | 207,512                | 1                                                       | 16 A1        |        |        |        |        |        | 1.00 |      |      |      |      |      |
| PC_3038                  | P11_D1  | LSIL | 91               | 102,316                      | 29,464                 | 6                                                       | 91           | 51     | 82     | 90     | 84     | 39     | 0.75 | 0.13 | 0.06 | 0.04 | 0.01 | 0.01 |
| PC_3046                  | P11_D2  | LSIL | 84               | 132,618                      | 58,194                 | 6                                                       | 84           | 90     | 62     | 31     | 30     | 68     | 0.69 | 0.18 | 0.08 | 0.02 | 0.01 | 0.01 |
| PC_3062                  | P11_D3  | LSIL | 51 A4            | 148,572                      | 41,620                 | 3                                                       | 51 A4        | 39     | 67     |        |        |        | 0.96 | 0.03 | 0.01 |      |      |      |
| PC_3086                  | P11_D4  | LSIL | <b>35 A2</b>     | 160,108                      | 101,614                | 3                                                       | <b>39 A</b>  | 67     | 35     |        |        |        | 0.56 | 0.29 | 0.15 |      |      |      |
| PC_2999                  | P11_D5  | LSIL | 39 A2            | 517,018                      | 351,454                | 3                                                       | 39 A         | 67     | 35     |        |        |        | 0.62 | 0.33 | 0.05 |      |      |      |
| PC_3007                  | P11_D6  | LSIL | 40               | 243,734                      | 46,454                 | 2                                                       | 40           | 39     |        |        |        |        | 0.88 | 0.12 |      |      |      |      |
| PC_3023                  | P11_D7  | LSIL | 39 A2            | 740,600                      | 525,878                | 3                                                       | 39 A         | 56     | 43     |        |        |        | 0.98 | 0.01 | 0.01 |      |      |      |
| PC_3031                  | P11_D8  | LSIL | 58 A2            | 161,618                      | 90,066                 | 3                                                       | 58 A2        | 52     | 81     |        |        |        | 0.72 | 0.25 | 0.03 |      |      |      |
| PC_3039                  | P11_D9  | LSIL | 81               | 313,654                      | 231,320                | 2                                                       | 81           | 43     |        |        |        |        | 0.97 | 0.03 |      |      |      |      |

**Supplementary Table 2** (continued)

| ID      | PL      | PAP  | HPV Type | Total Merged Reads (n) | Total Mapped Reads (n) | HPV Type (n) | HPV #1  | HPV #2 | HPV #3 | HPV #4 | HPV #5 | HPV #6 | p #1 | p #2 | p #3 | p #4 | p #5 | p #6 |
|---------|---------|------|----------|------------------------|------------------------|--------------|---------|--------|--------|--------|--------|--------|------|------|------|------|------|------|
| PC_3079 | P11_D10 | LSIL | 43       | 603,936                | 461,732                | 1            | 43      |        |        |        |        |        | 1.00 |      |      |      |      |      |
| PC_3000 | P11_D11 | LSIL | 51 A3    | 133,102                | 16,160                 | 3            | 51 A1   | 39     | 16     |        |        |        | 0.91 | 0.06 | 0.02 |      |      |      |
| PC_3024 | P11_D12 | LSIL | 39 A2    | 143,500                | 51,696                 | 3            | 39 A    | 16     | 43     |        |        |        | 0.75 | 0.24 | 0.01 |      |      |      |
| PC_3040 | P11_E1  | LSIL | 74       | 154,566                | 13,726                 | 4            | 39 A    | 44     | 74     | 16     |        |        | 0.55 | 0.23 | 0.22 | 0.01 |      |      |
| PC_3048 | P11_E2  | LSIL | 39 A2    | 795,470                | 614,336                | 1            | 39 A    |        |        |        |        |        | 1.00 |      |      |      |      |      |
| PC_3064 | P11_E3  | LSIL | 39 A2    | 112,554                | 27,900                 | 4            | 39 A    | 51     | 52     | 16     |        |        | 0.95 | 0.02 | 0.02 | 0.01 |      |      |
| PC_3072 | P11_E4  | LSIL | 51 B2    | 176,666                | 27,338                 | 3            | 51 B2   | 40     | 16     |        |        |        | 0.95 | 0.03 | 0.02 |      |      |      |
| PC_3001 | P11_E5  | LSIL | 40       | 305,320                | 196,398                | 3            | 40      | 51     | 43     |        |        |        | 0.64 | 0.35 | 0.01 |      |      |      |
| PC_3009 | P11_E6  | LSIL | 16 C1    | 243,784                | 189,034                | 2            | 16 C1   | 6      |        |        |        |        | 0.88 | 0.12 |      |      |      |      |
| PC_3025 | P11_E7  | LSIL | 67 A2    | 140,348                | 29,552                 | 3            | 67 A2   | 16     | 51     |        |        |        | 0.75 | 0.22 | 0.03 |      |      |      |
| PC_3049 | P11_E8  | LSIL | 51 A     | 301,144                | 100,922                | 2            | 51 A4   | 56     |        |        |        |        | 0.97 | 0.03 |      |      |      |      |
| PC_3057 | P11_E9  | LSIL | 54 A1    | 60,022                 | 9,190                  | 3            | 54 A1   | 16     | 53     |        |        |        | 0.74 | 0.25 | 0.01 |      |      |      |
| PC_3073 | P11_E10 | LSIL | 16 A2    | 361,292                | 264,282                | 1            | 16 A1,2 |        |        |        |        |        | 1.00 |      |      |      |      |      |
| PC_3081 | P11_E11 | LSIL | 51 A3    | 41,084                 | 10,078                 | 3            | 51 A1   | 39     | 43     |        |        |        | 0.97 | 0.02 | 0.01 |      |      |      |
| PC_2610 | P11_E12 | LSIL | 39 A2    | 183,508                | 48624                  | 1            | 39 A    |        |        |        |        |        | 1.00 |      |      |      |      |      |
| PC_2642 | P11_F1  | LSIL | 39 A2    | 265,374                | 138,400                | 3            | 39 A    | 16     | 18     |        |        |        | 0.93 | 0.06 | 0.01 |      |      |      |
| PC_2690 | P11_F3  | LSIL | 43       | 440,606                | 331,194                | 4            | 43      | 66     | 18     | 16     |        |        | 0.77 | 0.14 | 0.07 | 0.02 |      |      |
| PC_2698 | P11_F4  | LSIL | 39 A2    | 449,646                | 341,468                | 1            | 39 A    |        |        |        |        |        | 1.00 |      |      |      |      |      |
| PC_2611 | P11_F5  | LSIL | 84       | 759,680                | 146,418                | 1            | 84      |        |        |        |        |        | 1.00 |      |      |      |      |      |
| PC_2651 | P11_F6  | LSIL | 35 A1    | 673,276                | 76,172                 | 2            | 35 A1   | 39     |        |        |        |        | 0.74 | 0.26 |      |      |      |      |
| PC_2659 | P11_F7  | LSIL | 62       | 308,150                | 36,790                 | 1            | 62      |        |        |        |        |        | 1.00 |      |      |      |      |      |
| PC_2675 | P11_F8  | LSIL | 68 E1    | 582,066                | 57,072                 | 2            | 68      | 16     |        |        |        |        | 0.98 | 0.02 |      |      |      |      |
| PC_2683 | P11_F9  | LSIL | 62       | 504,304                | 100,586                | 2            | 62      | 56     |        |        |        |        | 0.92 | 0.08 |      |      |      |      |
| PC_2612 | P11_F10 | LSIL | 54 A1    | 81,752                 | 18,626                 | 3            | 54 A1   | 39     | 81     |        |        |        | 0.90 | 0.09 | 0.01 |      |      |      |
| PC_2620 | P11_F11 | LSIL | 16 A1    | 429,260                | 337,404                | 2            | 16 A1   | 39     |        |        |        |        | 0.89 | 0.11 |      |      |      |      |
| PC_2652 | P11_F12 | LSIL | 18 A1    | 176,334                | 23,824                 | 2            | 18 A1   | 39     |        |        |        |        | 0.93 | 0.07 |      |      |      |      |
| PC_2676 | P11_G1  | LSIL | 40       | 307,624                | 48,504                 | 5            | 40      | 44     | 39     | 43     | 53     |        | 0.56 | 0.38 | 0.03 | 0.01 | 0.01 |      |
| PC_2684 | P11_G2  | LSIL | 58 A3    | 76,416                 | 25,226                 | 2            | 58 A2   | 44     |        |        |        |        | 0.60 | 0.40 |      |      |      |      |
| PC_2692 | P11_G3  | LSIL | 43       | 294,944                | 54,114                 | 3            | 43      | 58     | 44     |        |        |        | 0.84 | 0.09 | 0.07 |      |      |      |
| PC_2700 | P11_G4  | LSIL | 39 A2    | 351,682                | 279,162                | 2            | 39 A    | 58     |        |        |        |        | 0.98 | 0.02 |      |      |      |      |
| PC_2613 | P11_G5  | LSIL | 54 A1    | 65,182                 | 4,936                  | 2            | 54 A1   | 39     |        |        |        |        | 0.99 | 0.01 |      |      |      |      |
| PC_2621 | P11_G6  | LSIL | 62       | 129,820                | 24,382                 | 5            | 62      | 51     | 90     | 84     | 83     |        | 0.46 | 0.41 | 0.06 | 0.06 | 0.01 |      |
| PC_2637 | P11_G7  | LSIL | 52 A1    | 86,988                 | 40,658                 | 1            | 52 A1   |        |        |        |        |        | 1.00 |      |      |      |      |      |
| PC_2661 | P11_G8  | LSIL | 51 A4    | 43,236                 | 17,496                 | 2            | 51 A1   | 84     |        |        |        |        | 0.88 | 0.12 |      |      |      |      |
| PC_2669 | P11_G9  | LSIL | 81       | 108,428                | 64,810                 | 2            | 81      | 66     |        |        |        |        | 0.59 | 0.41 |      |      |      |      |
| PC_2677 | P11_G10 | LSIL | 82 A2    | 106,552                | 33,860                 | 2            | 82 A2   | 84     |        |        |        |        | 0.99 | 0.01 |      |      |      |      |
| PC_2685 | P11_G11 | LSIL | 91       | 336,892                | 45,024                 | 1            | 91      |        |        |        |        |        | 1.00 |      |      |      |      |      |
| PC_2693 | P11_G12 | LSIL | 43       | 538,632                | 391,228                | 1            | 43      |        |        |        |        |        | 1.00 |      |      |      |      |      |
| PC_2614 | P11_H1  | LSIL | 39 A2    | 614,046                | 241,416                | 1            | 39 A    |        |        |        |        |        | 1.00 |      |      |      |      |      |
| PC_2678 | P11_H2  | LSIL | 52 A1    | 175,324                | 80,180                 | 3            | 52 A1   | 58     | 81     |        |        |        | 0.89 | 0.10 | 0.01 |      |      |      |
| PC_2686 | P11_H3  | LSIL | 16 A2    | 417,468                | 194,648                | 3            | 16 A2   | 52     | 58     |        |        |        | 0.76 | 0.22 | 0.02 |      |      |      |
| PC_2702 | P11_H4  | LSIL | 39 A2    | 615,566                | 404,610                | 1            | 39 A    |        |        |        |        |        | 1.00 |      |      |      |      |      |
| PC_2615 | P11_H5  | LSIL | 66 B2    | 87,348                 | 38,712                 | 1            | 66 B2   |        |        |        |        |        | 1.00 |      |      |      |      |      |
| PC_2655 | P11_H6  | LSIL | 39 A2    | 87,386                 | 21,386                 | 4            | 39 A    | 84     | 44     | 74     |        |        | 0.70 | 0.23 | 0.05 | 0.03 |      |      |
| PC_2663 | P11_H7  | LSIL | 35 A2    | 166,216                | 61,464                 | 1            | 35 A1,2 |        |        |        |        |        | 1.00 |      |      |      |      |      |
| PC_2695 | P11_H8  | LSIL | 39 A2    | 556,854                | 468,962                | 1            | 39 A    |        |        |        |        |        | 1.00 |      |      |      |      |      |
| PC_2624 | P11_H9  | LSIL | 39 A2    | 606,788                | 449,354                | 1            | 39 A    |        |        |        |        |        | 1.00 |      |      |      |      |      |
| PC_2664 | P11_H10 | LSIL | 16 A4    | 196,816                | 131,420                | 2            | 16 A1   | 39     |        |        |        |        | 0.68 | 0.32 |      |      |      |      |
| PC_2680 | P11_H11 | LSIL | 6 B1     | 382,046                | 62,782                 | 1            | 6 B1    |        |        |        |        |        | 1.00 |      |      |      |      |      |
| PC_2696 | P11_H12 | LSIL | 39 A2    | 406,312                | 267,566                | 1            | 39 A    |        |        |        |        |        | 1.00 |      |      |      |      |      |

**Supplementary Table 2** (continued)

| ID      | PL      | PAP  | HPV Type | Total Merged Reads (n) | Total Mapped Reads (n) | HPV Type (n) | HPV #1  | HPV #2 | HPV #3 | HPV #4 | HPV #5 | HPV #6 | p #1 | p #2 | p #3 | p #4 | p #5 | p #6 |
|---------|---------|------|----------|------------------------|------------------------|--------------|---------|--------|--------|--------|--------|--------|------|------|------|------|------|------|
| PC_3101 | P9_E6   | HSIL | 16 A1    | 276,904                | 202,426                | 1            | 16 A1   |        |        |        |        |        | 1.00 |      |      |      |      |      |
| PC_3109 | P9_E7   | HSIL | 16 A1    | 257,900                | 182,236                | 1            | 16 A1   |        |        |        |        |        | 1.00 |      |      |      |      |      |
| PC_3102 | P9_E10  | HSIL | 51 A4    | 111,284                | 19,942                 | 4            | 51 A4   | 39     | 52     | 16     |        |        | 0.91 | 0.05 | 0.03 | 0.01 |      |      |
| PC_3110 | P9_E11  | HSIL | 39 A2    | 290,156                | 202,112                | 1            | 39 A    |        |        |        |        |        | 1.00 |      |      |      |      |      |
| PC_3142 | P9_F1   | HSIL | 16 A1    | 287,112                | 121,304                | 1            | 16 A1   |        |        |        |        |        | 1.00 |      |      |      |      |      |
| PC_3103 | P9_F2   | HSIL | 16 A1    | 229,842                | 119,434                | 1            | 16 A1   |        |        |        |        |        | 1.00 |      |      |      |      |      |
| PC_3111 | P9_F3   | HSIL | 16 A1    | 357,738                | 139,506                | 1            | 16 A1   |        |        |        |        |        | 1.00 |      |      |      |      |      |
| PC_3119 | P9_F4   | HSIL | 16 A1    | 319,146                | 128,092                | 1            | 16 A1   |        |        |        |        |        | 1.00 |      |      |      |      |      |
| PC_3127 | P9_F5   | HSIL | 33 A1    | 178,144                | 67,688                 | 1            | 33 A1,2 |        |        |        |        |        | 1.00 |      |      |      |      |      |
| PC_3135 | P9_F6   | HSIL | 31 B2    | 208,128                | 62,228                 | 1            | 31 B1,2 |        |        |        |        |        | 1.00 |      |      |      |      |      |
| PC_3143 | P9_F7   | HSIL | 58 A2    | 191,080                | 29,722                 | 1            | 58 A2   |        |        |        |        |        | 1.00 |      |      |      |      |      |
| PC_3104 | P9_F8   | HSIL | 39 A2    | 184,298                | 32,962                 | 4            | 39 A    | 18     | 51     | 16     |        |        | 0.95 | 0.03 | 0.01 | 0.01 |      |      |
| PC_3112 | P9_F9   | HSIL | NA       | 161,424                | 9,116                  | 3            | 35 A1,2 | 16     | 18     |        |        |        | 0.94 | 0.04 | 0.02 |      |      |      |
| PC_3120 | P9_F10  | HSIL | 16 A1    | 251,164                | 136,528                | 1            | 16 A1   |        |        |        |        |        | 1.00 |      |      |      |      |      |
| PC_3144 | P9_F12  | HSIL | 18 A1    | 234,778                | 59,404                 | 2            | 18 A1   | 58     |        |        |        |        | 0.84 | 0.16 |      |      |      |      |
| PC_3121 | P9_G1   | HSIL | 51 A2    | 209,376                | 93,372                 | 1            | 51 A1   |        |        |        |        |        | 1.00 |      |      |      |      |      |
| PC_3129 | P9_G2   | HSIL | 16 A2    | 713,672                | 545,054                | 1            | 16 A1,2 |        |        |        |        |        | 1.00 |      |      |      |      |      |
| PC_3137 | P9_G3   | HSIL | 16 A1    | 261,602                | 127,236                | 2            | 16 A1   | 62     |        |        |        |        | 0.81 | 0.19 |      |      |      |      |
| PC_3145 | P9_G4   | HSIL | 58 A2    | 370,106                | 269,016                | 2            | 58 A2   | 54     |        |        |        |        | 0.96 | 0.04 |      |      |      |      |
| PC_3106 | P9_G5   | HSIL | 58 A3    | 78,976                 | 10,948                 | 1            | 58 A2   |        |        |        |        |        | 1.00 |      |      |      |      |      |
| PC_3114 | P9_G6   | HSIL | 16 A2    | 242,740                | 147,226                | 1            | 16 A1,2 |        |        |        |        |        | 1.00 |      |      |      |      |      |
| PC_3122 | P9_G7   | HSIL | 52 A1    | 226,378                | 116,138                | 2            | 52 A1   | 66     |        |        |        |        | 0.99 | 0.01 |      |      |      |      |
| PC_3146 | P9_G8   | HSIL | 16 A2    | 540,442                | 423,124                | 1            | 16 A1,2 |        |        |        |        |        | 1.00 |      |      |      |      |      |
| PC_3107 | P9_G9   | HSIL | 16 A2    | 471,444                | 349,684                | 3            | 16 A1,2 | 30     | 62     |        |        |        | 0.93 | 0.06 | 0.01 |      |      |      |
| PC_3123 | P9_G10  | HSIL | 31 C3    | 220,708                | 146,006                | 1            | 31 C1,3 |        |        |        |        |        | 1.00 |      |      |      |      |      |
| PC_3131 | P9_G12  | HSIL | 62       | 164,512                | 13,514                 | 4            | 52 A1   | 82     | 16     | 59     |        |        | 0.96 | 0.02 | 0.01 | 0.01 |      |      |
| PC_3140 | P9_H4   | HSIL | 16 A1    | 317,592                | 188,426                | 1            | 16 A1   |        |        |        |        |        | 1.00 |      |      |      |      |      |
| PC_3148 | P9_H5   | HSIL | 16 A2    | 554,998                | 406,296                | 2            | 16 A1,2 | 18     |        |        |        |        | 0.61 | 0.39 |      |      |      |      |
| PC_3125 | P19_F10 | HSIL | 16 C1    | 182,394                | 116,072                | 1            | 16 C1   |        |        |        |        |        | 1.00 |      |      |      |      |      |
| PC_1278 | P20_C12 | HSIL | 16 A4*   | 55,922                 | 33,290                 | 2            | 16 A1,2 | 39     |        |        |        |        | 0.99 | 0.01 |      |      |      |      |
| PC_3149 | P25_A7  | HSIL | 58 B2*   | 90,408                 | 37,374                 | 3            | 58 B2   | 39     | 16     |        |        |        | 0.73 | 0.22 | 0.05 |      |      |      |
| PC_3175 | P25_A9  | HSIL | 16 C1    | 429,950                | 341,420                | 1            | 16 C1   |        |        |        |        |        | 1.00 |      |      |      |      |      |
| PC_3187 | P25_A10 | HSIL | 16 A4*   | 198,666                | 140,648                | 2            | 16 A1   | 35     |        |        |        |        | 0.99 | 0.01 |      |      |      |      |
| PC_3172 | P25_A11 | HSIL | 16 A4*   | 97,068                 | 61,986                 | 3            | 35 A1,2 | 39     | 16     |        |        |        | 0.98 | 0.02 | 0.01 |      |      |      |
| PC_3150 | P25_B7  | HSIL | 61*      | 53,576                 | 6,394                  | 3            | 39 A    | 16     | 58     |        |        |        | 0.86 | 0.13 | 0.01 |      |      |      |
| PC_3163 | P25_B8  | HSIL | 16 A4    | 83,768                 | 34,466                 | 1            | 16 A1   |        |        |        |        |        | 1.00 |      |      |      |      |      |
| PC_3178 | P25_B9  | HSIL | 16 A1    | 122,278                | 92,284                 | 2            | 16 A1   | 44     |        |        |        |        | 0.99 | 0.01 |      |      |      |      |
| PC_3153 | P25_C7  | HSIL | 58 A2    | 53,648                 | 14,764                 | 3            | 58 A2   | 52     | 16     |        |        |        | 0.82 | 0.09 | 0.09 |      |      |      |
| PC_3164 | P25_C8  | HSIL | 16 C1    | 119,132                | 94,270                 | 1            | 16 C1   |        |        |        |        |        | 1.00 |      |      |      |      |      |
| PC_3179 | P25_C9  | HSIL | 73 A1*   | 59,262                 | 35,728                 | 2            | 73 A2   | 16     |        |        |        |        | 0.88 | 0.12 |      |      |      |      |
| PC_3190 | P25_C10 | HSIL | 16 A4    | 269,908                | 212,336                | 1            | 16 A1   |        |        |        |        |        | 1.00 |      |      |      |      |      |
| PC_3154 | P25_D7  | HSIL | 35 A2    | 155,558                | 71,634                 | 1            | 35 A1,2 |        |        |        |        |        | 1.00 |      |      |      |      |      |
| PC_3167 | P25_D8  | HSIL | 35 A2    | 37,264                 | 16,864                 | 2            | 36 A1,2 | 16     |        |        |        |        | 0.95 | 0.05 |      |      |      |      |
| PC_3180 | P25_D9  | HSIL | 16 A4*   | 122,100                | 86,816                 | 3            | 16 A1,2 | 44     | 74     |        |        |        | 0.98 | 0.01 | 0.01 |      |      |      |
| PC_3191 | P25_D10 | HSIL | 16 A4*   | 570,044                | 348,482                | 5            | 16 A1,2 | 44     | 74     | 62     | 54     |        | 0.67 | 0.18 | 0.13 | 0.01 | 0.01 |      |
| PC_3155 | P25_E7  | HSIL | 39 A1*   | 367,438                | 308,654                | 2            | 39 A1   | 52     |        |        |        |        | 0.95 | 0.05 |      |      |      |      |
| PC_3168 | P25_E8  | HSIL | 16 A2    | 249,124                | 181,846                | 2            | 16 A2   | 58     |        |        |        |        | 0.67 | 0.33 |      |      |      |      |
| PC_3181 | P25_E9  | HSIL | 16 A4*   | 225,558                | 157,564                | 2            | 16 A1   | 68     |        |        |        |        | 0.99 | 0.01 |      |      |      |      |
| PC_3192 | P25_E10 | HSIL | 33 A2    | 238,546                | 123,548                | 2            | 33 A2   | 54     |        |        |        |        | 0.99 | 0.01 |      |      |      |      |
| PC_3169 | P25_F8  | HSIL | 16 A1    | 119,918                | 77,584                 | 1            | 16 A1   |        |        |        |        |        | 1.00 |      |      |      |      |      |

**Supplementary Table 2 (continued)**

| ID      | PL      | PAP  | HPV Type   | Total Merged Reads (n) | Total Mapped Reads (n) | HPV Type (n) | HPV #1         | HPV #2 | HPV #3 | HPV #4 | HPV #5 | HPV #6 | p #1 | p #2 | p #3 | p #4 | p #5 | p #6 |
|---------|---------|------|------------|------------------------|------------------------|--------------|----------------|--------|--------|--------|--------|--------|------|------|------|------|------|------|
| PC_3182 | P25_F9  | HSIL | 39 A2      | 139,590                | 97,146                 | 2            | 39 A           | 51     |        |        |        |        | 0.99 | 0.01 |      |      |      |      |
| PC_3193 | P25_F10 | HSIL | 16 A1      | 430,734                | 368,762                | 1            | 16 A1          |        |        |        |        |        | 1.00 |      |      |      |      |      |
| PC_3157 | P25_G7  | HSIL | 16 A1      | 211,808                | 165,168                | 1            | 16 A1          |        |        |        |        |        | 1.00 |      |      |      |      |      |
| PC_3173 | P25_G8  | HSIL | 35 A2      | 319,774                | 204,232                | 1            | 35 A1,2        |        |        |        |        |        | 1.00 |      |      |      |      |      |
| PC_3184 | P25_G9  | HSIL | 16 A1      | 219,202                | 138,658                | 2            | 16 A1          | 39     |        |        |        |        | 0.97 | 0.03 |      |      |      |      |
| PC_3195 | P25_G10 | HSIL | 18 A2      | 136,122                | 40,256                 | 1            | 18 A3,4        |        |        |        |        |        | 1.00 |      |      |      |      |      |
| PC_3158 | P25_H7  | HSIL | 16 A2      | 254,954                | 204,866                | 1            | 16 A2          |        |        |        |        |        | 1.00 |      |      |      |      |      |
| PC_3174 | P25_H8  | HSIL | 16 A4*     | 235,520                | 184,872                | 1            | 16 A1          |        |        |        |        |        | 1.00 |      |      |      |      |      |
| PC_3186 | P25_H9  | HSIL | <b>83*</b> | 100,474                | 68,930                 | 1            | <b>35 A1,2</b> |        |        |        |        |        | 1.00 |      |      |      |      |      |
| PC_3171 | P25_H10 | HSIL | 16 A4*     | 104,174                | 68,234                 | 1            | 16 A1          |        |        |        |        |        | 1.00 |      |      |      |      |      |

E6/E7, HPV E6/E7 gene amplified by PCR; HSIL, high-grade squamous intraepithelial lesion; HPV, human papillomavirus; Info, information; ID, sample identification; L1, HPV L1 gene amplified by PCR; LSIL, low-grade squamous intraepithelial lesion; PCR, polymerase chain reaction; PL, PCR plate number and 96-well plate position; NA, not available/sequenceable; p #n, proportional composition of HPV genotype ranked in descending order by abundance; PAP, Pap smear; Seq, Sanger (dideoxy) sequencing; HPV #n, HPV genotype(s) identified ranked in descending order by abundance.

<sup>a</sup> Sample ID, plate number and well position of LSIL ( $n = 95$ ) and HSIL ( $n = 60$ ) cervical cytology samples.

<sup>b</sup> HPV genotype determined by BLAST alignment of E6/E7 amplicon/Sanger-based sequences. HPV genotypes are in numerals; variant lineage and sublineage are in alphanumeric values, respectively. For non-sequenceable or interpretable E6/E7 results, HPV L1 sequencing results were used alternatively for genotype determination. These samples ( $n = 16$ ) are indicated by a star (\*). Samples (9/155 samples, 5.81%) with discordant HPV typing results by Sanger sequencing/BLAST and deep sequencing/taxonomic profiling are in bold.

<sup>c</sup> Sequence data and HPV genotype composition determined by the Taxonomic Profiling workflow.

<sup>d</sup> Total merged and mapped reads statistics generated by the Taxonomic Profiling workflow.

<sup>e</sup> HPV genotype(s) determined by taxonomic profiling of amplicon/deep seq-based sequences. HPV genotypes are in numerals; variant lineage and sublineage are in alphanumeric values, respectively. Up to 6 predominant HPV type(s) per sample are tabulated. Only types meeting qualification (confidence score  $\geq 0.995$ ) and constituting  $\geq 1\%$  of the HPV composition within the sample) are listed. The reported confidence score equates to  $1 - p$ -value under the null hypothesis that the reads map at random positions in the database [32]. The corresponding proportional composition are tabulated under p #n. Discordant HPV typing results by Sanger and deep sequencing are highlighted in bold ( $n = 9$ ).
