# Supplementary material for: HPV DeepSeq: Ultra-Fast Method of NGS Data Analysis and Visualization Using Automated Workflows and a Customized Papillomavirus Database in CLC Genomics Workbench
Source: Preprints.org preprint supplement (doi:10.20944/preprints202108.0149.v1), 2021-08-06
Supplement: Supplementary file 1 [file supplementary]

## Sheet: merged (Filtered)
ID	Family (Aggregated)	Taxonomy	Combined Abundance	Min	Max	Mean	Median	Std	P11_A1_S1_L001 (paired, trimmed pairs) Abundance	P11_A2_S2_L001 (paired, trimmed pairs) Abundance	P11_A3_S3_L001 (paired, trimmed pairs) Abundance	P11_A4_S4_L001 (paired, trimmed pairs) Abundance	P11_A5_S5_L001 (paired, trimmed pairs) Abundance	P11_A6_S6_L001 (paired, trimmed pairs) Abundance	P11_A7_S7_L001 (paired, trimmed pairs) Abundance	P11_A8_S8_L001 (paired, trimmed pairs) Abundance	P11_A9_S9_L001 (paired, trimmed pairs) Abundance	P11_A10_S10_L001 (paired, trimmed pairs) Abundance	P11_A11_S11_L001 (paired, trimmed pairs) Abundance	P11_A12_S12_L001 (paired, trimmed pairs) Abundance	P11_B1_S13_L001 (paired, trimmed pairs) Abundance	P11_B2_S14_L001 (paired, trimmed pairs) Abundance	P11_B3_S15_L001 (paired, trimmed pairs) Abundance	P11_B4_S16_L001 (paired, trimmed pairs) Abundance	P11_B5_S17_L001 (paired, trimmed pairs) Abundance	P11_B6_S18_L001 (paired, trimmed pairs) Abundance	P11_B7_S19_L001 (paired, trimmed pairs) Abundance	P11_B8_S20_L001 (paired, trimmed pairs) Abundance	P11_B9_S21_L001 (paired, trimmed pairs) Abundance	P11_B10_S22_L001 (paired, trimmed pairs) Abundance	P11_B11_S23_L001 (paired, trimmed pairs) Abundance	P11_B12_S24_L001 (paired, trimmed pairs) Abundance	P11_C1_S25_L001 (paired, trimmed pairs) Abundance	P11_C2_S26_L001 (paired, trimmed pairs) Abundance	P11_C3_S27_L001 (paired, trimmed pairs) Abundance	P11_C4_S28_L001 (paired, trimmed pairs) Abundance	P11_C5_S29_L001 (paired, trimmed pairs) Abundance	P11_C6_S30_L001 (paired, trimmed pairs) Abundance	P11_C7_S31_L001 (paired, trimmed pairs) Abundance	P11_C8_S32_L001 (paired, trimmed pairs) Abundance	P11_C9_S33_L001 (paired, trimmed pairs) Abundance	P11_C10_S34_L001 (paired, trimmed pairs) Abundance	P11_C11_S35_L001 (paired, trimmed pairs) Abundance	P11_C12_S36_L001 (paired, trimmed pairs) Abundance	P11_D1_S37_L001 (paired, trimmed pairs) Abundance	P11_D2_S38_L001 (paired, trimmed pairs) Abundance	P11_D3_S39_L001 (paired, trimmed pairs) Abundance	P11_D4_S40_L001 (paired, trimmed pairs) Abundance	P11_D5_S41_L001 (paired, trimmed pairs) Abundance
HPV44	HPV44	Virus_dsDNA; Papillomaviridae; Alpha; Alpha 10; HPV44	101444	0	62877	654.477	0	5317.68	0	0	0	0	0	0	0	0	0	0	0	0	0	0	0	0	0	0	0	0	0	0	0	0	0	0	0	0	0	0	0	0	0	0	0	0	0	0	0	0	0
HPV6	HPV6	Virus_dsDNA; Papillomaviridae; Alpha; Alpha 10; HPV6	85145	0	62119	549.323	0	5310	0	0	0	0	0	0	0	0	0	0	0	0	0	0	0	0	0	0	0	0	0	0	0	0	0	0	0	0	0	0	0	0	0	0	0	0	0	0	0	0	0
HPV74	HPV74	Virus_dsDNA; Papillomaviridae; Alpha; Alpha 10; HPV74	49904	0	44654	321.961	0	3593.2	0	0	0	0	0	0	0	0	0	0	0	0	0	0	0	0	0	0	0	0	0	0	0	0	0	0	0	0	0	0	0	1016	0	0	0	0	0	0	0	0	0
HPV73	HPV73	Virus_dsDNA; Papillomaviridae; Alpha; Alpha 11; HPV73	30871	0	30871	199.168	0	2479.62	0	0	0	0	0	0	0	0	0	0	0	0	0	0	0	0	0	0	0	0	0	0	0	0	0	0	0	0	0	0	0	0	0	0	0	0	0	0	0	0	0
HPV54	HPV54	Virus_dsDNA; Papillomaviridae; Alpha; Alpha 13; HPV54	176293	0	102765	1137.37	0	8466.92	0	0	0	0	0	0	844	0	6180	0	1169	6680	0	0	0	0	0	223	10895	0	0	0	0	0	0	0	0	0	541	0	1771	102765	0	0	0	0	0	0	0	0	0
HPV90	HPV90	Virus_dsDNA; Papillomaviridae; Alpha; Alpha 14; HPV90	12720	0	10237	82.0645	0	832.987	0	0	0	0	0	0	0	0	0	0	0	0	0	0	0	0	0	0	0	0	0	0	0	0	0	0	0	0	0	0	0	0	0	0	0	0	1140	10237	0	0	0
HPV61	HPV61	Virus_dsDNA; Papillomaviridae; Alpha; Alpha 3; HPV61	827	0	827	5.33548	0	66.4262	0	0	0	0	0	0	0	0	0	0	0	0	0	0	0	0	0	827	0	0	0	0	0	0	0	0	0	0	0	0	0	0	0	0	0	0	0	0	0	0	0
HPV62	HPV62	Virus_dsDNA; Papillomaviridae; Alpha; Alpha 3; HPV62	375436	0	94402	2422.17	0	12163.1	0	0	0	0	0	0	1169	0	0	310	1000	41559	0	47926	0	0	0	7320	0	0	0	0	0	0	2807	94402	0	0	0	0	0	0	0	0	2111	0	200	4512	0	0	0
HPV81	HPV81	Virus_dsDNA; Papillomaviridae; Alpha; Alpha 3; HPV81	269362	0	223083	1737.82	0	18153	0	0	0	0	0	0	0	0	0	0	0	0	0	0	0	0	0	0	0	0	0	0	0	0	0	0	0	2957	0	0	2188	0	0	0	0	0	0	0	0	0	0
HPV83	HPV83	Virus_dsDNA; Papillomaviridae; Alpha; Alpha 3; HPV83	292	0	292	1.88387	0	23.454	0	0	0	0	0	0	0	0	0	0	0	0	0	0	0	0	0	0	0	0	0	0	0	0	0	0	0	0	0	0	0	0	0	0	0	0	0	0	0	0	0
HPV84	HPV84	Virus_dsDNA; Papillomaviridae; Alpha; Alpha 3; HPV84	215574	0	145982	1390.8	0	12193.3	0	0	0	0	0	0	0	0	0	155	4352	0	0	0	0	0	0	0	0	0	0	0	0	0	0	0	377	15956	0	0	0	0	0	0	0	0	423	39775	0	0	0
HPV89	HPV89	Virus_dsDNA; Papillomaviridae; Alpha; Alpha 3; HPV89	67404	0	53553	434.865	0	4393.37	0	0	0	0	0	0	0	0	0	0	0	0	0	0	0	0	0	0	0	817	53553	0	0	0	300	11494	0	0	0	943	0	0	0	0	297	0	0	0	0	0	0
HPV51	HPV51	Virus_dsDNA; Papillomaviridae; Alpha; Alpha 5; HPV51	636114	0	232551	4103.96	0	22452.8	0	0	0	0	0	0	0	0	0	0	0	0	0	0	0	0	0	235	0	3452	232551	0	0	0	0	0	0	0	0	0	0	0	0	0	0	0	3657	452	39608	0	0
HPV82	HPV82	Virus_dsDNA; Papillomaviridae; Alpha; Alpha 5; HPV82	36255	0	33404	233.903	0	2685.98	0	0	0	0	0	0	0	0	0	0	0	0	0	0	948	0	0	0	0	0	0	0	0	0	0	0	0	0	0	0	0	0	0	0	0	0	1650	0	0	0	0
HPV30	HPV30	Virus_dsDNA; Papillomaviridae; Alpha; Alpha 6; HPV30	221422	0	137869	1428.53	0	12095.6	0	0	0	0	0	0	0	0	0	0	0	0	0	0	0	0	0	2714	137869	57693	0	0	0	0	0	0	0	0	0	0	0	0	0	0	0	0	0	723	0	0	0
HPV53	HPV53	Virus_dsDNA; Papillomaviridae; Alpha; Alpha 6; HPV53	1167	0	542	7.52903	0	55.1012	0	0	0	0	0	0	0	0	0	0	0	0	0	0	0	0	0	163	0	0	0	0	0	0	0	0	0	0	0	0	0	0	0	0	0	0	0	388	0	0	0
HPV56	HPV56	Virus_dsDNA; Papillomaviridae; Alpha; Alpha 6; HPV56	16235	0	7510	104.742	0	764.303	0	0	0	0	0	0	0	0	0	0	0	0	0	0	0	0	0	0	0	0	0	0	0	0	0	0	0	0	0	800	0	0	0	0	0	0	0	0	0	0	0
HPV66	HPV66	Virus_dsDNA; Papillomaviridae; Alpha; Alpha 6; HPV66	225856	0	70340	1457.14	0	7921.28	0	0	0	0	0	0	0	0	0	12581	12947	15259	0	0	0	0	0	0	0	0	0	0	0	0	0	0	266	0	70340	0	0	0	0	0	0	0	0	0	0	0	0
HPV18	HPV18	Virus_dsDNA; Papillomaviridae; Alpha; Alpha 7; HPV18	297837	0	159980	1921.53	0	13984.5	0	0	0	0	0	0	0	0	0	0	0	0	0	0	0	0	0	0	0	0	0	0	0	0	0	0	0	0	0	0	0	0	0	0	0	0	0	0	0	0	0
HPV39	HPV39	Virus_dsDNA; Papillomaviridae; Alpha; Alpha 7; HPV39	7639005	0	610930	49283.9	0	119427	25674	10200	320670	13224	31333	237147	149757	302375	31118	8467	376	0	5330	139508	2020	11951	1762	455	1181	44138	1552	7776	236214	488633	11391	359455	7352	313835	0	0	0	610	7144	0	8681	0	267	0	1141	56571	218527
HPV59	HPV59	Virus_dsDNA; Papillomaviridae; Alpha; Alpha 7; HPV59	110	0	110	0.709677	0	8.83541	0	0	0	0	0	0	0	0	0	0	0	0	0	0	0	0	0	0	0	0	0	0	0	0	0	0	0	0	0	0	0	0	0	0	0	0	0	0	0	0	0
HPV68	HPV68	Virus_dsDNA; Papillomaviridae; Alpha; Alpha 7; HPV68	60948	0	55429	393.213	0	4456.92	0	0	0	0	0	0	0	0	0	0	0	0	0	0	2748	0	0	0	0	0	0	0	1506	0	0	0	0	0	0	0	0	0	0	0	0	0	0	467	0	0	0
HPV40	HPV40	Virus_dsDNA; Papillomaviridae; Alpha; Alpha 8; HPV40	194345	0	125678	1253.84	0	10793.1	0	0	0	0	0	0	0	0	0	0	0	0	0	0	0	0	0	0	0	0	0	0	0	0	0	0	0	0	0	0	0	0	0	0	0	0	0	0	0	0	0
HPV43	HPV43	Virus_dsDNA; Papillomaviridae; Alpha; Alpha 8; HPV43	1444469	0	460752	9319.15	0	53575.2	311	0	0	0	0	0	0	0	26584	0	0	0	0	0	1143	87332	34092	0	0	0	0	0	0	0	0	0	2913	124591	0	0	0	0	2731	0	0	0	0	0	0	0	0
HPV91	HPV91	Virus_dsDNA; Papillomaviridae; Alpha; Alpha 8; HPV91	452965	0	196476	2922.35	0	21344.1	655	0	7359	174013	0	0	0	7849	196476	0	0	0	0	0	0	0	0	0	0	0	0	0	0	0	0	0	0	0	0	0	0	0	0	0	0	0	21830	0	0	0	0
HPV16	HPV16	Virus_dsDNA; Papillomaviridae; Alpha; Alpha 9; HPV16	8066613	0	544860	52042.7	101	100971	674	0	0	0	332	0	0	0	0	973	1453	12251	486485	1313	70766	116156	0	0	0	0	0	51738	0	0	922	0	9721	0	2129	91460	2142	0	2654	115389	2121	206279	0	0	0	0	0
HPV31	HPV31	Virus_dsDNA; Papillomaviridae; Alpha; Alpha 9; HPV31	208644	0	145871	1346.09	0	12696.7	0	0	0	0	0	0	0	0	0	0	0	0	0	0	0	0	0	0	0	0	0	0	0	0	0	0	0	0	0	0	0	0	0	0	0	0	0	907	0	0	0
HPV33	HPV33	Virus_dsDNA; Papillomaviridae; Alpha; Alpha 9; HPV33	188862	0	121343	1218.46	0	11122.9	0	0	0	0	0	0	0	0	0	0	0	0	0	0	0	0	0	0	0	0	0	0	0	0	0	0	0	0	0	0	0	0	0	0	0	0	0	0	0	0	0
HPV35	HPV35	Virus_dsDNA; Papillomaviridae; Alpha; Alpha 9; HPV35	1288906	0	309721	8315.52	0	37854.4	13284	309721	3367	0	0	0	0	0	0	1318	4793	220118	0	0	0	0	0	0	0	0	0	0	0	0	0	0	0	0	0	0	351	2366	155230	0	0	0	0	0	0	15013	16825
HPV52	HPV52	Virus_dsDNA; Papillomaviridae; Alpha; Alpha 9; HPV52	488824	0	117984	3153.7	0	15467.9	1050	3121	117984	0	0	0	0	0	0	0	0	0	0	0	0	0	0	0	0	0	0	0	0	0	0	0	0	0	0	1889	43124	0	0	0	0	0	0	0	0	0	0
HPV58	HPV58	Virus_dsDNA; Papillomaviridae; Alpha; Alpha 9; HPV58	606586	0	258717	3913.46	0	23272.9	0	0	0	0	0	0	0	0	0	0	0	0	0	0	627	0	93594	0	0	0	0	0	0	3031	0	0	0	0	0	0	0	0	0	0	0	0	0	0	0	0	0
HPV67	HPV67	Virus_dsDNA; Papillomaviridae; Alpha; Alpha 9; HPV67	166257	0	114544	1072.63	0	9629.87	0	0	0	0	0	0	0	0	0	0	0	0	0	0	0	0	0	0	0	0	0	0	0	0	0	0	0	0	0	0	0	0	0	0	0	0	0	0	474	29235	114544
[truncated: 114 more columns]
