# Supplementary material for: HPV DeepSeq: Ultra-Fast Method of NGS Data Analysis and Visualization Using Automated Workflows and a Customized Papillomavirus Database in CLC Genomics Workbench
Source: Preprints.org preprint supplement (doi:10.20944/preprints202108.0149.v1), 2021-08-06
Supplement: Supplementary file 2 [file supplementary]

Archive with 4 entries (4 files):
- pathogens-1290545 - supplementary figure 1.pdf
- pathogens-1290545 - table s1.xlsx
- pathogens-1290545 - table s2.pdf
- pathogens-1290545 - table s3.pdf
