# Supplementary material for: HPV DeepSeq: Ultra-Fast Method of NGS Data Analysis and Visualization Using Automated Workflows and a Customized Papillomavirus Database in CLC Genomics Workbench
Source: Preprints.org preprint supplement (doi:10.20944/preprints202108.0149.v1), 2021-08-06
Supplement: Supplementary file 2 [file supplementary › pathogens-1290545 - supplementary figure 1.pdf]

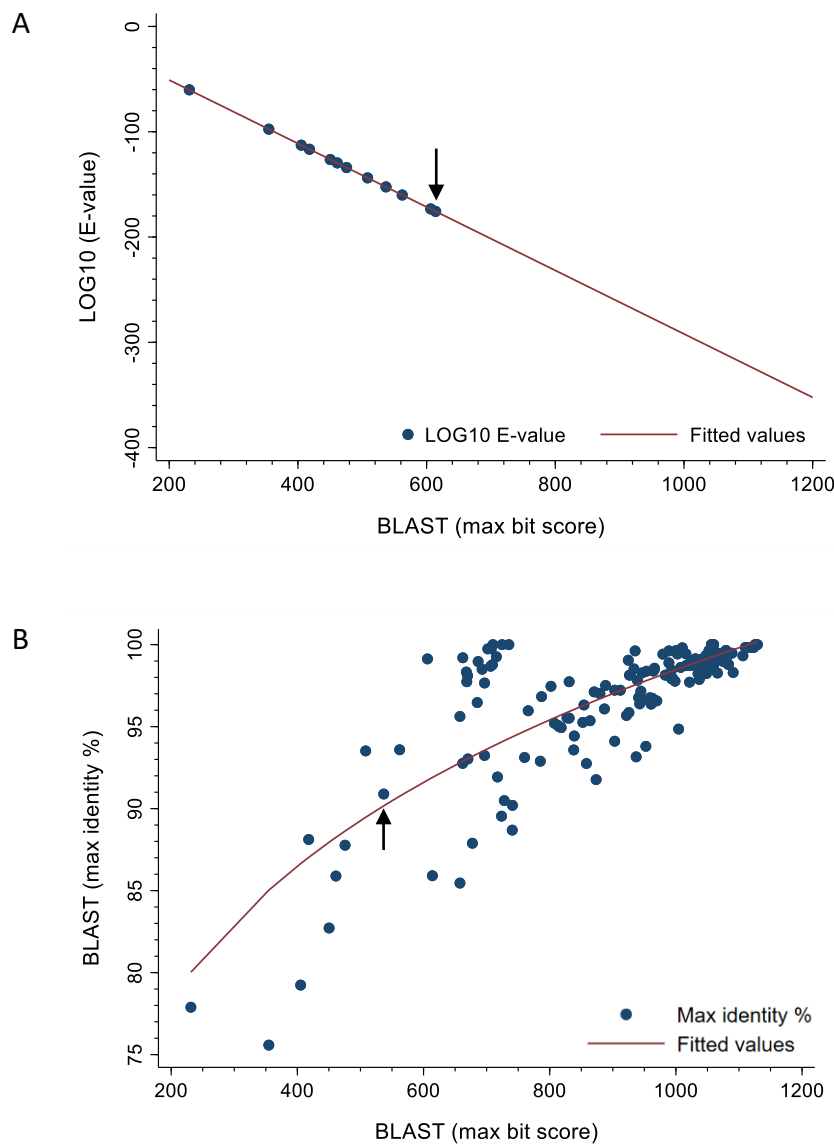

**Supplementary Figure 1.** Correlation between BLAST statistics. **(A)** Scatterplot of BLAST maximum bit score and  $\log_{10}$  E-value for the study samples ( $n = 154$ ) showed a perfect linear negative-correlation ( $R^2 = 1.0$ ). The regression line ( $\log_{10}$  E-value =  $9.41 + -0.301 * \text{max bit score}$ ) shown as (—) may be employed for prediction of E-values based on bit scores. E-values  $< 2.13E-176$  ( $\log_{10} -176$ ) equivalent to max bit scores  $> 614$  (↓) were rounded and reported as 0 and interpreted as *identical* between the query and hit sequences in the BLAST report. Extrapolation of the fitted line allows for prediction of actual E-values based on bit scores (range 200-1,200) as shown. **(B)** Scatterplot of BLAST maximum bit score and maximum identity (%) for the study samples ( $n = 154$ ) showed high curvilinear correlation ( $R^2 = 0.999$ ). The least squares regression curve (max identity % =  $37.02 * \text{max bit score}^{0.1416}$ ) (—) based on the *power* equation model may be employed for prediction of max identity based on bit score. Bit scores  $< 531$  equivalent to an E-value  $> 3.793E-151$  ( $\log_{10} -150$ ) and max identity of  $< 90\%$  (↑) may serve as a threshold for quality checks by manual verification of HPV genotype. Of note, one sample was excluded from the plot due to zero BLAST hits.
