# Supplementary material for: HPV DeepSeq: Ultra-Fast Method of NGS Data Analysis and Visualization Using Automated Workflows and a Customized Papillomavirus Database in CLC Genomics Workbench
Source: Preprints.org preprint supplement (doi:10.20944/preprints202108.0149.v1), 2021-08-06
Supplement: Supplementary file 2 [file supplementary › pathogens-1290545 - table s3.pdf]

**Supplementary Table 3** BLAST results for HPV genotyping by Sanger sequencing

| Sample Info <sup>a</sup> |      |       | BLAST statistics <sup>b</sup> |              |                          |                          |                  |                |              |              |                  |           |            |            |             |  |
|--------------------------|------|-------|-------------------------------|--------------|--------------------------|--------------------------|------------------|----------------|--------------|--------------|------------------|-----------|------------|------------|-------------|--|
| ID<br>(query)            | PAP  | AMP   | HSP<br>(n)                    | Lowest E-val | Accession (E-val)        | HPV<br>Type <sup>c</sup> | Hit <sup>d</sup> | Total<br>score | Max<br>score | Min<br>E-val | Max<br>bit score | Max<br>id | Max<br>%id | Max<br>pos | Max<br>%pos |  |
| PC_2994                  | LSIL | E6/E7 | 16                            | 0            | HPV39_A2REF_KC470239     | 39_A2                    | Access seq       | 487            | 487          | 0            | 937.04           | 531       | 93.16      | 531        | 93.16       |  |
| PC (3002                 | LSIL | E6/E7 | 3                             | 0            | HPV35_A2REF_HQ537727     | 35_A2                    | Access seq       | 540            | 540          | 0            | 1038.94          | 556       | 98.06      | 556        | 98.06       |  |
| PC_3010                  | LSIL | E6/E7 | 17                            | 0            | HPV39_A2REF_KC470239     | 39_A2                    | Access seq       | 522            | 522          | 0            | 1004.33          | 553       | 94.85      | 553        | 94.85       |  |
| PC_3018                  | LSIL | E6/E7 | 1                             | 0            | HPV91REF                 | 91                       | Access seq       | 521            | 521          | 0            | 1002.41          | 526       | 99.43      | 526        | 99.43       |  |
| PC_3042                  | LSIL | E6/E7 | 16                            | 0            | HPV39_A2REF_KC470239     | 39_A2                    | Access seq       | 409            | 409          | 0            | 787.07           | 428       | 96.83      | 428        | 96.83       |  |
| PC_3050                  | LSIL | E6/E7 | 17                            | 0            | HPV39_A2REF_KC470239     | 39_A2                    | Access seq       | 585            | 585          | 0            | 1125.46          | 585       | 100        | 585        | 100         |  |
| PC_3058                  | LSIL | E6/E7 | 17                            | 0            | HPV39_A2REF_KC470239     | 39_A2                    | Access seq       | 577            | 577          | 0            | 1110.08          | 578       | 99.83      | 578        | 99.83       |  |
| PC_3066                  | LSIL | E6/E7 | 17                            | 0            | HPV39_A2REF_KC470239     | 39_A2                    | Access seq       | 584            | 584          | 0            | 1123.54          | 585       | 99.83      | 585        | 99.83       |  |
| PC_3074                  | LSIL | E6/E7 | 8                             | 0            | HPV91REF                 | 91                       | Access seq       | 528            | 528          | 0            | 1015.87          | 533       | 99.44      | 533        | 99.44       |  |
| PC_3082                  | LSIL | L1    | 231                           | 0            | HPV66_B1REF_EF177188     | 66_B1                    | Access seq       | 733            | 733          | 0            | 662.22           | 370       | 99.2       | 370        | 99.2        |  |
| PC_3003                  | LSIL | E6/E7 | 9                             | 0            | HPV66_B1REF_EF177188     | 66_B1                    | Access seq       | 430            | 430          | 0            | 827.44           | 470       | 95.53      | 470        | 95.53       |  |
| PC_3011                  | LSIL | E6/E7 | 11                            | 0            | HPV35_A2REF_HQ537727     | 35_A2                    | Access seq       | 531            | 531          | 0            | 1021.63          | 554       | 97.71      | 554        | 97.71       |  |
| PC_3019                  | LSIL | E6/E7 | 11                            | 0            | HPV16_A1REF_EU_PPH16     | 16_A1                    | Access seq       | 550            | 550          | 0            | 1058.17          | 560       | 99.29      | 560        | 99.29       |  |
| PC_3059                  | LSIL | E6/E7 | 17                            | 0            | HPV39_A2REF_KC470239     | 39_A2                    | Access seq       | 557            | 557          | 0            | 1071.62          | 564       | 99.3       | 564        | 99.3        |  |
| PC_3067                  | LSIL | E6/E7 | 11                            | 0            | HPV16_A1REF_EU_PPH16     | 16_A1                    | Access seq       | 514            | 514          | 0            | 988.95           | 518       | 99.62      | 518        | 99.62       |  |
| PC_3075                  | LSIL | E6/E7 | 11                            | 0            | HPV16_A1REF_EU_PPH16     | 16_A1                    | Access seq       | 385            | 385          | 0            | 740.92           | 497       | 90.2       | 497        | 90.2        |  |
| PC_3083                  | LSIL | E6/E7 | 9                             | 0            | HPV58_C1REF_HQ537774     | 58_C1                    | Access seq       | 544            | 544          | 0            | 1046.63          | 553       | 98.93      | 553        | 98.93       |  |
| PC_2996                  | LSIL | E6/E7 | 1                             | 1.586E-144   | HPV62REF                 | 62                       | Access seq       | 264            | 264          | 1.59E-144    | 508.28           | 303       | 93.52      | 303        | 93.52       |  |
| PC_3004                  | LSIL | E6/E7 | 17                            | 0            | HPV30_A3REF_KF436844     | 30_A3                    | Access seq       | 545            | 545          | 0            | 1048.55          | 555       | 98.93      | 555        | 98.93       |  |
| PC_3020                  | LSIL | E6/E7 | 5                             | 2.1342E-176  | HPV30_A3REF_KF436844     | 30_A3                    | Access seq       | 319            | 319          | 2.13E-176    | 614.02           | 439       | 85.91      | 439        | 85.91       |  |
| PC_3028                  | LSIL | E6/E7 | 18                            | 0            | HPV51_B1REF_KF436883     | 51                       | Access seq       | 557            | 557          | 0            | 1071.62          | 564       | 99.3       | 564        | 99.3        |  |
| PC_3036                  | LSIL | E6/E7 | 11                            | 0            | HPV16_A1REF_EU_PPH16     | 16_A1                    | Access seq       | 549            | 549          | 0            | 1056.24          | 559       | 98.59      | 559        | 98.59       |  |
| PC_3044                  | LSIL | E6/E7 | 17                            | 0            | HPV39_A2REF_KC470239     | 39_A2                    | Access seq       | 579            | 579          | 0            | 1113.92          | 586       | 99.83      | 586        | 99.83       |  |
| PC_3060                  | LSIL | E6/E7 | 17                            | 0            | HPV39_A2REF_KC470239     | 39_A2                    | Access seq       | 583            | 583          | 0            | 1121.61          | 585       | 99.83      | 585        | 99.83       |  |
| PC_3076                  | LSIL | E6/E7 | 7                             | 2.274E-117   | HPV39_A2REF_KC470239     | 39_A2                    | Access seq       | 217            | 217          | 2.27E-117    | 417.91           | 282       | 88.12      | 282        | 88.12       |  |
| PC_3084                  | LSIL | E6/E7 | 17                            | 0            | HPV39_A2REF_KC470239     | 39_A2                    | Access seq       | 575            | 575          | 0            | 1106.23          | 585       | 99.32      | 585        | 99.32       |  |
| PC_3005                  | LSIL | L1    | 267                           | 5.427E-174   | HPV53_A1REF_X74482       | 53_A1                    | Access seq       | 671            | 671          | 5.43E-174    | 606.32           | 340       | 99.13      | 340        | 99.13       |  |
| PC_3013                  | LSIL | E6/E7 | 17                            | 0            | HPV39_A2REF_KC470239     | 39_A2                    | Access seq       | 567            | 567          | 0            | 1090.85          | 577       | 98.3       | 577        | 98.3        |  |
| PC_3029                  | LSIL | E6/E7 | 9                             | 0            | HPV66_A1REF_HPU31794     | 66_A1                    | Access seq       | 479            | 479          | 0            | 921.65           | 510       | 95.68      | 510        | 95.68       |  |
| PC_3061                  | LSIL | E6/E7 | 11                            | 0            | HPV16_C1REF_AF2_AF472509 | 16_C1                    | Access seq       | 563            | 563          | 0            | 1083.16          | 571       | 98.79      | 571        | 98.79       |  |
| PC_3069                  | LSIL | E6/E7 | 8                             | 0            | HPV52_A1REF_X74481       | 52_A1                    | Access seq       | 446            | 446          | 0            | 858.21           | 486       | 92.75      | 486        | 92.75       |  |
| PC_3085                  | LSIL | E6/E7 | 4                             | 0            | HPV54_A1REF_HPU37488     | 54_A1                    | Access seq       | 525            | 525          | 0            | 1010.1           | 526       | 99.81      | 526        | 99.81       |  |
| PC_2998                  | LSIL | E6/E7 | 3                             | 0            | HPV35_A2REF_HQ537727     | 35_A2                    | Access seq       | 539            | 539          | 0            | 1037.02          | 557       | 98.76      | 557        | 98.76       |  |
| PC_3006                  | LSIL | E6/E7 | 11                            | 0            | HPV16_A2REF_EU_AF536179  | 16_A2                    | Access seq       | 538            | 538          | 0            | 1035.09          | 554       | 98.23      | 554        | 98.23       |  |
| PC_3014                  | LSIL | L1    | 275                           | 0            | HPV53_A1REF_X74482       | 53_A1                    | Access seq       | 740            | 740          | 0            | 668.53           | 389       | 97.74      | 389        | 97.74       |  |
| PC_3030                  | LSIL | E6/E7 | 11                            | 0            | HPV16_A1REF_EU_PPH16     | 16_A1                    | Access seq       | 561            | 561          | 0            | 1079.32          | 569       | 99.3       | 569        | 99.3        |  |
| PC_3038                  | LSIL | E6/E7 | 1                             | 0            | HPV91REF                 | 91                       | Access seq       | 362            | 362          | 0            | 696.7            | 414       | 93.24      | 414        | 93.24       |  |
| PC_3046                  | LSIL | E6/E7 | 2                             | 0            | HPV84REF                 | 84                       | Access seq       | 398            | 398          | 0            | 765.92           | 429       | 95.97      | 429        | 95.97       |  |

Supplementary Table 3 (continued)

| ID<br>(query) | PAP  | AMP   | HSP<br>(n) | Lowest E-val | Accession (E-val)         | HPV<br>Type <sup>c</sup> | Hit <sup>d</sup> | Total<br>score | Max<br>score | Min<br>E-val | Max<br>bit score | Max<br>id | Max<br>%id | Max<br>pos | Max<br>%pos |
|---------------|------|-------|------------|--------------|---------------------------|--------------------------|------------------|----------------|--------------|--------------|------------------|-----------|------------|------------|-------------|
| PC_3062       | LSIL | E6/E7 | 18         | 0            | HPV51,_A4REF_KF436875     | 51,_A4                   | Access seq       | 367            | 367          | 0            | 706.31           | 374       | 98.68      | 374        | 98.68       |
| PC_3086       | LSIL | E6/E7 | 3          | 0            | HPV35,_A2REF_HQ537727     | 35,_A2                   | Access seq       | 481            | 481          | 0            | 925.5            | 509       | 95.86      | 509        | 95.86       |
| PC_2999       | LSIL | E6/E7 | 7          | 0            | HPV39,_A2REF_KC470239     | 39,_A2                   | Access seq       | 495            | 495          | 0            | 952.42           | 545       | 93.8       | 545        | 93.8        |
| PC_3007       | LSIL | E6/E7 | 1          | 0            | HPV40REF                  | 40                       | Access seq       | 344            | 344          | 0            | 662.09           | 397       | 92.76      | 397        | 92.76       |
| PC_3023       | LSIL | E6/E7 | 17         | 0            | HPV39,_A2REF_KC470239     | 39,_A2                   | Access seq       | 586            | 586          | 0            | 1127.38          | 586       | 100        | 586        | 100         |
| PC_3031       | LSIL | E6/E7 | 9          | 0            | HPV58,_A2REF_HQ537752     | 58,_A2                   | Access seq       | 528            | 528          | 0            | 1015.87          | 539       | 98.72      | 539        | 98.72       |
| PC_3039       | LSIL | E6/E7 | 1          | 0            | HPV81REF                  | 81                       | Access seq       | 514            | 514          | 0            | 988.95           | 536       | 98.89      | 536        | 98.89       |
| PC_3079       | LSIL | E6/E7 | 2          | 0            | HPV43REF                  | 43                       | Access seq       | 511            | 511          | 0            | 983.18           | 529       | 98.14      | 529        | 98.14       |
| PC_3000       | LSIL | E6/E7 | 18         | 0            | HPV51,_A3REF_KF436873     | 51,_A3                   | Access seq       | 348            | 348          | 0            | 669.78           | 363       | 98.11      | 363        | 98.11       |
| PC_3024       | LSIL | E6/E7 | 17         | 0            | HPV39,_A2REF_KC470239     | 39,_A2                   | Access seq       | 554            | 554          | 0            | 1065.86          | 568       | 98.27      | 568        | 98.27       |
| PC_3040       | LSIL | E6/E7 | 2          | 8.2989E-161  | HPV74REF                  | 74                       | Access seq       | 292            | 292          | 8.3E-161     | 562.11           | 336       | 93.59      | 336        | 93.59       |
| PC_3048       | LSIL | E6/E7 | 17         | 0            | HPV39,_A2REF_KC470239     | 39,_A2                   | Access seq       | 583            | 583          | 0            | 1121.61          | 584       | 99.83      | 584        | 99.83       |
| PC_3064       | LSIL | E6/E7 | 9          | 0            | HPV39,_A2REF_KC470239     | 39,_A2                   | Access seq       | 436            | 436          | 0            | 838.98           | 475       | 94.43      | 475        | 94.43       |
| PC_3072       | LSIL | E6/E7 | 18         | 0            | HPV51,_B2REF_KF436886     | 51,_B2                   | Access seq       | 356            | 356          | 0            | 685.16           | 383       | 96.47      | 383        | 96.47       |
| PC_3001       | LSIL | E6/E7 | 1          | 0            | HPV40REF                  | 40                       | Access seq       | 376            | 376          | 0            | 723.62           | 471       | 89.54      | 471        | 89.54       |
| PC_3009       | LSIL | E6/E7 | 11         | 0            | HPV16,_C1REF_AF2_AF472509 | 16,_C1                   | Access seq       | 556            | 556          | 0            | 1069.7           | 559       | 99.47      | 559        | 99.47       |
| PC_3025       | LSIL | E6/E7 | 13         | 9.9772E-135  | HPV67,_A2REF_HQ537780     | 67,_A2                   | Access seq       | 247            | 247          | 9.98E-135    | 475.59           | 330       | 87.77      | 330        | 87.77       |
| PC_3049       | LSIL | E6/E7 | 18         | 0            | HPV51,A4REF_KF436875      | 51,_A                    | Access seq       | 454            | 454          | 0            | 873.59           | 502       | 91.77      | 502        | 91.77       |
| PC_3057       | LSIL | E6/E7 | 4          | 0            | HPV54,_A1REF_HPU37488     | 54,_A1                   | Access seq       | 347            | 347          | 0            | 667.86           | 354       | 98.33      | 354        | 98.33       |
| PC_3073       | LSIL | E6/E7 | 11         | 0            | HPV16,_A2REF_EU_AF536179  | 16,_A2                   | Access seq       | 560            | 560          | 0            | 1077.39          | 570       | 99.13      | 570        | 99.13       |
| PC_3081       | LSIL | E6/E7 | 18         | 0            | HPV51,_A3REF_KF436873     | 51,_A3                   | Access seq       | 408            | 408          | 0            | 785.14           | 444       | 92.89      | 444        | 92.89       |
| PC_2610       | LSIL | E6/E7 | 58         | 0            | HPV39,_A2REF_KC470239     | 39,_A2                   | Access seq       | 1066           | 1066         | 0            | 962.48           | 562       | 96.73      | 562        | 96.73       |
| PC_2642       | LSIL | E6/E7 | 58         | 0            | HPV39,_A2REF_KC470239     | 39,_A2                   | Access seq       | 1138           | 1138         | 0            | 1027.4           | 579       | 98.81      | 579        | 98.81       |
| PC_2690       | LSIL | E6/E7 | 58         | 0            | HPV43REF                  | 43                       | Access seq       | 974            | 974          | 0            | 879.53           | 519       | 97.01      | 519        | 97.01       |
| PC_2698       | LSIL | E6/E7 | 58         | 0            | HPV39,_A2REF_KC470239     | 39,_A2                   | Access seq       | 1174           | 1174         | 0            | 1059.86          | 587       | 100        | 587        | 100         |
| PC_2611       | LSIL | E6/E7 | 47         | 0            | HPV84REF                  | 84                       | Access seq       | 894            | 894          | 0            | 807.39           | 497       | 95.21      | 497        | 95.21       |
| PC_2651       | LSIL | E6/E7 | 60         | 0            | HPV35,_A1REF_X74477       | 35,_A1                   | Access seq       | 1134           | 1134         | 0            | 1023.8           | 578       | 98.97      | 578        | 98.97       |
| PC_2659       | LSIL | E6/E7 | 57         | 0            | HPV62REF                  | 62                       | Access seq       | 964            | 964          | 0            | 870.51           | 506       | 97.12      | 506        | 97.12       |
| PC_2675       | LSIL | E6/E7 | 59         | 0            | HPV68,_E1REF_KC470277     | 68,_E1                   | Access seq       | 1154           | 1154         | 0            | 1041.83          | 587       | 98.82      | 587        | 98.82       |
| PC_2683       | LSIL | E6/E7 | 64         | 0            | HPV62REF                  | 62                       | Access seq       | 902            | 902          | 0            | 814.61           | 495       | 95.01      | 495        | 95.01       |
| PC_2612       | LSIL | E6/E7 | 54         | 0            | HPV54,_A1REF_HPU37488     | 54,_A1                   | Access seq       | 1028           | 1028         | 0            | 928.22           | 531       | 98.15      | 531        | 98.15       |
| PC_2620       | LSIL | E6/E7 | 55         | 0            | HPV16,_A1REF_EU_PPH16     | 16,_A1                   | Access seq       | 1102           | 1102         | 0            | 994.94           | 570       | 97.94      | 570        | 97.94       |
| PC_2652       | LSIL | E6/E7 | 50         | 0            | HPV18,_A1REF_AY262282     | 18,_A1                   | Access seq       | 1160           | 1160         | 0            | 1047.24          | 586       | 99.32      | 586        | 99.32       |
| PC_2676       | LSIL | E6/E7 | 15         | 2.75205E-98  | HPV40REF                  | 40                       | Access seq       | 392            | 392          | 2.75E-98     | 354.75           | 393       | 75.58      | 393        | 75.58       |
| PC_2684       | LSIL | E6/E7 | 65         | 3.8427E-127  | HPV58,_A3REF_HQ537758     | 58,_A3                   | Access seq       | 528            | 498          | 3.84E-127    | 450.32           | 359       | 82.72      | 359        | 82.72       |
| PC_2692       | LSIL | E6/E7 | 61         | 0            | HPV43REF                  | 43                       | Access seq       | 1026           | 1026         | 0            | 926.41           | 529       | 98.14      | 529        | 98.14       |
| PC_2700       | LSIL | E6/E7 | 58         | 0            | HPV39,_A2REF_KC470239     | 39,_A2                   | Access seq       | 1174           | 1174         | 0            | 1059.86          | 587       | 100        | 587        | 100         |
| PC_2613       | LSIL | E6/E7 | 54         | 0            | HPV54,_A1REF_HPU37488     | 54,_A1                   | Access seq       | 920            | 920          | 0            | 830.84           | 475       | 97.74      | 475        | 97.74       |
| PC_2621       | LSIL | E6/E7 | 76         | 1.6181E-113  | HPV62REF                  | 62                       | Access seq       | 448            | 448          | 1.62E-113    | 405.24           | 374       | 79.24      | 374        | 79.24       |
| PC_2637       | LSIL | E6/E7 | 51         | 0            | HPV52,_A1REF_X74481       | 52,_A1                   | Access seq       | 1108           | 1108         | 0            | 1000.35          | 557       | 99.64      | 557        | 99.64       |

**Supplementary Table 3 (continued)**

| ID<br>(query) | PAP  | AMP   | HSP<br>(n) | Lowest E-val | Accession (E-val)             | HPV<br>Type <sup>c</sup> | Hit <sup>d</sup> | Total<br>score | Max<br>score | Min<br>E-val | Max<br>bit score | Max<br>id | Max<br>%id | Max<br>pos | Max<br>%pos |
|---------------|------|-------|------------|--------------|-------------------------------|--------------------------|------------------|----------------|--------------|--------------|------------------|-----------|------------|------------|-------------|
| PC_2661       | LSIL | E6/E7 | 54         | 0            | HPV51,_A4REF_KF436875         | 51,_A4                   | Access seq       | 944            | 944          | 0            | 852.48           | 523       | 95.26      | 523        | 95.26       |
| PC_2669       | LSIL | E6/E7 | 60         | 0            | HPV81REF                      | 81                       | Access seq       | 806            | 806          | 0            | 728.04           | 476       | 90.49      | 476        | 90.49       |
| PC_2677       | LSIL | E6/E7 | 50         | 0            | HPV82,_A2REF_KF436787         | 82,_A2                   | Access seq       | 1070           | 1070         | 0            | 966.09           | 546       | 98.56      | 546        | 98.56       |
| PC_2685       | LSIL | E6/E7 | 57         | 0            | HPV91REF                      | 91                       | Access seq       | 888            | 888          | 0            | 801.98           | 460       | 97.46      | 460        | 97.46       |
| PC_2693       | LSIL | E6/E7 | 61         | 0            | HPV43REF                      | 43                       | Access seq       | 1034           | 1034         | 0            | 933.63           | 531       | 98.52      | 531        | 98.52       |
| PC_2614       | LSIL | E6/E7 | 58         | 0            | HPV39,_A2REF_KC470239         | 39,_A2                   | Access seq       | 1106           | 1106         | 0            | 998.55           | 570       | 97.77      | 570        | 97.77       |
| PC_2678       | LSIL | E6/E7 | 51         | 0            | HPV52,_A1REF_X74481           | 52,_A1                   | Access seq       | 1010           | 1010         | 0            | 911.99           | 525       | 97.22      | 525        | 97.22       |
| PC_2686       | LSIL | E6/E7 | 55         | 0            | HPV16,_A2REF_EU_AF536179      | 16,_A2                   | Access seq       | 1100           | 1100         | 0            | 993.14           | 569       | 98.44      | 569        | 98.44       |
| PC_2702       | LSIL | E6/E7 | 58         | 0            | HPV39,_A2REF_KC470239         | 39,_A2                   | Access seq       | 1170           | 1170         | 0            | 1056.26          | 593       | 99.16      | 593        | 99.16       |
| PC_2615       | LSIL | E6/E7 | 50         | 0            | HPV66,_B2REF_EF177187         | 66,_B2                   | Access seq       | 1046           | 1046         | 0            | 944.45           | 548       | 97.16      | 548        | 97.16       |
| PC_2655       | LSIL | E6/E7 | 65         | 0            | HPV39,_A2REF_KC470239         | 39,_A2                   | Access seq       | 820            | 820          | 0            | 740.67           | 494       | 88.69      | 494        | 88.69       |
| PC_2663       | LSIL | E6/E7 | 60         | 0            | HPV35,_A2REF_HQ537727         | 35,_A2                   | Access seq       | 1116           | 1116         | 0            | 1007.57          | 569       | 98.61      | 569        | 98.61       |
| PC_2695       | LSIL | E6/E7 | 58         | 0            | HPV39,_A2REF_KC470239         | 39,_A2                   | Access seq       | 1170           | 1170         | 0            | 1056.26          | 585       | 100        | 585        | 100         |
| PC_2624       | LSIL | E6/E7 | 58         | 0            | HPV39,_A2REF_KC470239         | 39,_A2                   | Access seq       | 1170           | 1170         | 0            | 1056.26          | 585       | 100        | 585        | 100         |
| PC_2664       | LSIL | E6/E7 | 52         | 0            | HPV16,_A4REF_ASIA_EA_AF534061 | 16,_A4                   | Access seq       | 728            | 728          | 0            | 657.71           | 482       | 85.46      | 482        | 85.46       |
| PC_2680       | LSIL | E6/E7 | 51         | 0            | HPV_6,_B1REF_FR751337         | 6,_B1                    | Access seq       | 984            | 984          | 0            | 888.54           | 510       | 97.51      | 510        | 97.51       |
| PC_2696       | LSIL | E6/E7 | 58         | 0            | HPV39,_A2REF_KC470239         | 39,_A2                   | Access seq       | 1170           | 1170         | 0            | 1056.26          | 593       | 99.16      | 593        | 99.16       |
| PC_3101       | HSIL | E6/E7 | 11         | 0            | HPV16,_A1REF_EU_PPH16         | 16,_A1                   | Access seq       | 562            | 562          | 0            | 1081.24          | 574       | 99.31      | 574        | 99.31       |
| PC_3109       | HSIL | E6/E7 | 11         | 0            | HPV16,_A1REF_EU_PPH16         | 16,_A1                   | Access seq       | 537            | 537          | 0            | 1033.17          | 551       | 99.1       | 551        | 99.1        |
| PC_3102       | HSIL | E6/E7 | 18         | 0            | HPV51,_A4REF_KF436875         | 51,_A4                   | Access seq       | 352            | 352          | 0            | 677.47           | 450       | 87.89      | 450        | 87.89       |
| PC_3110       | HSIL | E6/E7 | 17         | 0            | HPV39,_A2REF_KC470239         | 39,_A2                   | Access seq       | 587            | 587          | 0            | 1129.31          | 587       | 100        | 587        | 100         |
| PC_3142       | HSIL | E6/E7 | 11         | 0            | HPV16,_A1REF_EU_PPH16         | 16,_A1                   | Access seq       | 539            | 539          | 0            | 1037.02          | 546       | 99.09      | 546        | 99.09       |
| PC_3103       | HSIL | E6/E7 | 11         | 0            | HPV16,_A1REF_EU_PPH16         | 16,_A1                   | Access seq       | 545            | 545          | 0            | 1048.55          | 557       | 98.24      | 557        | 98.24       |
| PC_3111       | HSIL | E6/E7 | 11         | 0            | HPV16,_A1REF_EU_PPH16         | 16,_A1                   | Access seq       | 561            | 561          | 0            | 1079.32          | 565       | 99.65      | 565        | 99.65       |
| PC_3119       | HSIL | E6/E7 | 11         | 0            | HPV16,_A1REF_EU_PPH16         | 16,_A1                   | Access seq       | 551            | 551          | 0            | 1060.09          | 560       | 98.77      | 560        | 98.77       |
| PC_3127       | HSIL | E6/E7 | 6          | 0            | HPV33,_A1REF_PPH33CG          | 33,_A1                   | Access seq       | 504            | 504          | 0            | 969.72           | 535       | 96.57      | 535        | 96.57       |
| PC_3135       | HSIL | E6/E7 | 11         | 0            | HPV31,_B2REF_HQ537680         | 31,_B2                   | Access seq       | 395            | 395          | 0            | 760.15           | 460       | 93.12      | 460        | 93.12       |
| PC_3143       | HSIL | E6/E7 | 9          | 0            | HPV58,_A2REF_HQ537752         | 58,_A2                   | Access seq       | 362            | 362          | 0            | 696.7            | 376       | 97.66      | 376        | 97.66       |
| PC_3104       | HSIL | E6/E7 | 16         | 0            | HPV39,_A2REF_KC470239         | 39,_A2                   | Access seq       | 906            | 906          | 0            | 818.21           | 488       | 94.94      | 488        | 94.94       |
| PC_3112       | HSIL | L1    | 0          |              | Not Available                 | NA                       | Access seq       | NA             | NA           | NA           | NA               | NA        | NA         | NA         | NA          |
| PC_3120       | HSIL | E6/E7 | 11         | 0            | HPV16,_A1REF_EU_PPH16         | 16,_A1                   | Access seq       | 532            | 532          | 0            | 1023.56          | 542       | 98.72      | 542        | 98.72       |
| PC_3144       | HSIL | E6/E7 | 16         | 0            | HPV18,_A1REF_AY262282         | 18,_A1                   | Access seq       | 449            | 449          | 0            | 863.97           | 473       | 95.36      | 473        | 95.36       |
| PC_3121       | HSIL | E6/E7 | 18         | 0            | HPV51,_A2REF_KF436870         | 51,_A2                   | Access seq       | 509            | 509          | 0            | 979.34           | 514       | 99.42      | 514        | 99.42       |
| PC_3129       | HSIL | E6/E7 | 11         | 0            | HPV16,_A2REF_EU_AF536179      | 16,_A2                   | Access seq       | 563            | 563          | 0            | 1083.16          | 574       | 98.8       | 574        | 98.8        |
| PC_3137       | HSIL | E6/E7 | 11         | 0            | HPV16,_A1REF_EU_PPH16         | 16,_A1                   | Access seq       | 539            | 539          | 0            | 1037.02          | 553       | 97.88      | 553        | 97.88       |
| PC_3145       | HSIL | E6/E7 | 9          | 0            | HPV58,_A2REF_HQ537752         | 58,_A2                   | Access seq       | 547            | 547          | 0            | 1052.4           | 551       | 99.64      | 551        | 99.64       |
| PC_3106       | HSIL | E6/E7 | 9          | 0            | HPV58,_A3REF_HQ537758         | 58,_A3                   | Access seq       | 900            | 900          | 0            | 812.8            | 502       | 95.08      | 502        | 95.08       |
| PC_3114       | HSIL | E6/E7 | 11         | 0            | HPV16,_A2REF_EU_AF536179      | 16,_A2                   | Access seq       | 1130           | 1130         | 0            | 1020.19          | 574       | 98.8       | 574        | 98.8        |
| PC_3122       | HSIL | E6/E7 | 8          | 0            | HPV52,_A1REF_X74481           | 52,_A1                   | Access seq       | 502            | 502          | 0            | 965.88           | 517       | 98.48      | 517        | 98.48       |
| PC_3146       | HSIL | E6/E7 | 11         | 0            | HPV16,_A2REF_EU_AF536179      | 16,_A2                   | Access seq       | 559            | 559          | 0            | 1075.47          | 569       | 98.96      | 569        | 98.96       |

Supplementary Table 3 (continued)

| ID<br>(query) | PAP  | AMP   | HSP<br>(n) | Lowest E-val | Accession (E-val)            | HPV<br>Type <sup>c</sup> | Hit <sup>d</sup> | Total<br>score | Max<br>score | Min<br>E-val | Max<br>bit score | Max<br>id | Max<br>%id | Max<br>pos | Max<br>%pos |
|---------------|------|-------|------------|--------------|------------------------------|--------------------------|------------------|----------------|--------------|--------------|------------------|-----------|------------|------------|-------------|
| PC_3107       | HSIL | E6/E7 | 11         | 0            | HPV16_A2REF_EU_AF536179      | 16_A2                    | Access seq       | 1142           | 1142         | 0            | 1031.01          | 577       | 99.14      | 577        | 99.14       |
| PC_3123       | HSIL | E6/E7 | 11         | 0            | HPV31_C3REF_HQ537685         | 31_C3                    | Access seq       | 550            | 550          | 0            | 1058.17          | 559       | 99.11      | 559        | 99.11       |
| PC_3131       | HSIL | E6/E7 | 1          | 0            | HPV62REF                     | <b>62</b>                | Access seq       | 492            | 492          | 0            | 946.65           | 515       | 98.28      | 515        | 98.28       |
| PC_3140       | HSIL | E6/E7 | 11         | 0            | HPV16_A1REF_EU_PPH16         | 16_A1                    | Access seq       | 552            | 552          | 0            | 1062.01          | 563       | 99.47      | 563        | 99.47       |
| PC_3148       | HSIL | E6/E7 | 11         | 0            | HPV16_A2REF_EU_AF536179      | 16_A2                    | Access seq       | 489            | 489          | 0            | 940.88           | 509       | 96.77      | 509        | 96.77       |
| PC_3125       | HSIL | E6/E7 | 11         | 0            | HPV16_C1REF_AF2_AF472509     | 16_C1                    | Access seq       | 566            | 566          | 0            | 1088.93          | 569       | 99.48      | 569        | 99.48       |
| PC_1278       | HSIL | L1    | 273        | 0            | HPV16_A4REF_ASIA_EA_AF534061 | 16_A4                    | Access seq       | 814            | 814          | 0            | 735.26           | 407       | 100        | 407        | 100         |
| PC_3149       | HSIL | L1    | 289        | 0            | HPV58_B2REF_HQ537764         | 58_B2                    | Access seq       | 767            | 767          | 0            | 692.88           | 394       | 98.5       | 394        | 98.5        |
| PC_3175       | HSIL | E6/E7 | 144        | 0            | HPV16_C1REF_AF2_AF472509     | 16_C1                    | Access seq       | 946            | 946          | 0            | 854.28           | 497       | 96.32      | 497        | 96.32       |
| PC_3187       | HSIL | L1    | 257        | 0            | HPV16_A4REF_ASIA_EA_AF534061 | 16_A4                    | Access seq       | 786            | 786          | 0            | 710.01           | 393       | 100        | 393        | 100         |
| PC_3172       | HSIL | L1    | 234        | 6.74034E-61  | HPV16_A4REF_ASIA_EA_AF534061 | <b>16_A4</b>             | Access seq       | 255            | 255          | 6.74E-61     | 231.22           | 236       | 77.89      | 236        | 77.89       |
| PC_3150       | HSIL | L1    | 304        | 2.7766E-130  | HPV61REF                     | <b>61</b>                | Access seq       | 688            | 510          | 2.78E-130    | 461.14           | 341       | 85.89      | 341        | 85.89       |
| PC_3163       | HSIL | E6/E7 | 116        | 0            | HPV16_A4REF_ASIA_EA_AF534061 | 16_A4                    | Access seq       | 742            | 742          | 0            | 670.34           | 427       | 93.03      | 427        | 93.03       |
| PC_3178       | HSIL | E6/E7 | 169        | 0            | HPV16_A1REF_EU_PPH16         | 16_A1                    | Access seq       | 1062           | 1062         | 0            | 958.88           | 567       | 96.76      | 567        | 96.76       |
| PC_3153       | HSIL | E6/E7 | 129        | 0            | HPV58_A2REF_HQ537752         | 58_A2                    | Access seq       | 794            | 794          | 0            | 717.22           | 467       | 91.93      | 467        | 91.93       |
| PC_3164       | HSIL | E6/E7 | 178        | 0            | HPV16_C1REF_AF2_AF472509     | 16_C1                    | Access seq       | 1044           | 1044         | 0            | 942.64           | 560       | 96.39      | 560        | 96.39       |
| PC_3179       | HSIL | L1    | 269        | 0            | HPV73_A1REF_X94165           | 73_A1                    | Access seq       | 728            | 728          | 0            | 657.71           | 393       | 95.62      | 393        | 95.62       |
| PC_3190       | HSIL | E6/E7 | 157        | 0            | HPV16_A4REF_ASIA_EA_AF534061 | 16_A4                    | Access seq       | 920            | 920          | 0            | 830.84           | 490       | 95.52      | 490        | 95.52       |
| PC_3154       | HSIL | E6/E7 | 200        | 0            | HPV35_A2REF_HQ537727         | 35_A2                    | Access seq       | 1000           | 1000         | 0            | 902.97           | 525       | 97.22      | 525        | 97.22       |
| PC_3167       | HSIL | E6/E7 | 198        | 0            | HPV35_A2REF_HQ537727         | 35_A2                    | Access seq       | 1040           | 1040         | 0            | 939.04           | 538       | 97.82      | 538        | 97.82       |
| PC_3180       | HSIL | L1    | 265        | 0            | HPV16_A4REF_ASIA_EA_AF534061 | 16_A4                    | Access seq       | 785            | 785          | 0            | 709.11           | 402       | 98.77      | 402        | 98.77       |
| PC_3191       | HSIL | L1    | 280        | 0            | HPV16_A4REF_ASIA_EA_AF534061 | 16_A4                    | Access seq       | 777            | 777          | 0            | 701.89           | 390       | 99.74      | 390        | 99.74       |
| PC_3155       | HSIL | L1    | 387        | 4.437E-153   | HPV39_A1REF_PPHT39           | 39_A1                    | Access seq       | 1028           | 594          | 4.44E-153    | 536.89           | 359       | 90.89      | 359        | 90.89       |
| PC_3168       | HSIL | E6/E7 | 159        | 0            | HPV16_A2REF_EU_AF536179      | 16_A2                    | Access seq       | 928            | 928          | 0            | 838.05           | 525       | 93.58      | 525        | 93.58       |
| PC_3181       | HSIL | L1    | 247        | 0            | HPV16_A4REF_ASIA_EA_AF534061 | 16_A4                    | Access seq       | 783            | 783          | 0            | 707.3            | 393       | 99.75      | 393        | 99.75       |
| PC_3192       | HSIL | E6/E7 | 177        | 0            | HPV33_A2REF_HQ537698         | 33_A2                    | Access seq       | 1056           | 1056         | 0            | 953.47           | 545       | 98.38      | 545        | 98.38       |
| PC_3169       | HSIL | E6/E7 | 164        | 0            | HPV16_A1REF_EU_PPH16         | 16_A1                    | Access seq       | 1036           | 1036         | 0            | 935.43           | 521       | 99.62      | 521        | 99.62       |
| PC_3182       | HSIL | E6/E7 | 207        | 0            | HPV39_A2REF_KC470239         | 39_A2                    | Access seq       | 1016           | 982          | 0            | 886.74           | 515       | 96.08      | 515        | 96.08       |
| PC_3193       | HSIL | E6/E7 | 150        | 0            | HPV16_A1REF_EU_PPH16         | 16_A1                    | Access seq       | 1064           | 1064         | 0            | 960.68           | 558       | 96.37      | 558        | 96.37       |
| PC_3157       | HSIL | E6/E7 | 141        | 0            | HPV16_A1REF_EU_PPH16         | 16_A1                    | Access seq       | 1068           | 1068         | 0            | 964.28           | 549       | 98.39      | 549        | 98.39       |
| PC_3173       | HSIL | E6/E7 | 182        | 0            | HPV35_A2REF_HQ537727         | 35_A2                    | Access seq       | 1100           | 1100         | 0            | 993.14           | 566       | 97.92      | 566        | 97.92       |
| PC_3184       | HSIL | E6/E7 | 167        | 0            | HPV16_A1REF_EU_PPH16         | 16_A1                    | Access seq       | 1050           | 1050         | 0            | 948.05           | 545       | 96.63      | 545        | 96.63       |
| PC_3195       | HSIL | E6/E7 | 178        | 0            | HPV18_A2REF_EF202146         | 18_A2                    | Access seq       | 1024           | 1024         | 0            | 924.61           | 520       | 99.05      | 520        | 99.05       |
| PC_3158       | HSIL | E6/E7 | 145        | 0            | HPV16_A2REF_EU_AF536179      | 16_A2                    | Access seq       | 1000           | 1000         | 0            | 902.97           | 543       | 94.11      | 543        | 94.11       |
| PC_3174       | HSIL | L1    | 263        | 0            | HPV16_A4REF_ASIA_EA_AF534061 | 16_A4                    | Access seq       | 802            | 802          | 0            | 724.44           | 401       | 100        | 401        | 100         |
| PC_3186       | HSIL | L1    | 275        | 0            | HPV83REF                     | <b>83</b>                | Access seq       | 760            | 760          | 0            | 686.57           | 386       | 98.97      | 386        | 98.97       |
| PC_3171       | HSIL | L1    | 270        | 0            | HPV16_A4REF_ASIA_EA_AF534061 | 16_A4                    | Access seq       | 792            | 792          | 0            | 715.42           | 400       | 99.26      | 400        | 99.26       |

Access seq, Accession sequence name; E6/E7, HPV E6/E7 gene amplified by PCR; HSIL, high-grade squamous intraepithelial lesion; HPV, human papillomavirus; Info, information; ID, sample identification; L1, HPV L1 gene amplified by PCR; LSIL, low-grade squamous intraepithelial lesion; NA, not available/sequenceable; PAP, Pap smear; PCR, polymerase chain reaction; Query, sequence used for BLAST search; Seq, Sanger (dideoxy) sequencing

<sup>a</sup> Sample ID of LSIL ( $n = 95$ ) and HSIL ( $n = 60$ ) cervical cytology samples subjected to HPV E6/E7 or L1 gene amplification by PCR. The amplified nucleotide sequences i.e., query sequences were BLAST-aligned for HPV genotyping.

<sup>b</sup> BLAST statistics nomenclature and definitions from left to right of table columns [33].

HSP (n), Number of high scoring pairs from the source database.

Lowest E-val, Lowest Expect value.

Accession (E-val), Accession name of the matched database sequence with the lowest E-value.

HPV Type, HPV genotype (numeral), variant and sub-lineage (alphanumeric) of the Accession sequence.

Hit, Name of the sequence found in the BLAST search with the max score.

Total score, Total alignment score for all HSPs.

Max score, Maximum (best) score or highest alignment score of all HSPs.

Min E-value, Minimum (best) e-value of all HSPs.

Max bit score, Maximum (best) bit score of all HSPs.

Max id, Maximum number of identical residues in the query and Hit sequence.

Max %id, Percentage of maximum identical residues in the query and Hit sequence.

Max pos, Maximum number of similar but not necessarily identical residues in the query and Hit sequence.

Max %pos, Percentage of maximum similar but not necessarily identical residues in the query and Hit sequence.

<sup>c</sup> HPV genotype as determined by BLAST alignment of E6/E7 amplicon/Sanger-based sequences and assigned according to the best Hit result. HPV genotypes are in numerals; variant lineage and sublineage are in alphanumeric values, respectively. For non-sequenceable or interpretable E6/E7 results, HPV L1 sequencing results ( $n = 16$ ) were used alternatively for genotype determination. Samples (9/155 samples, 5.81%) with discordant HPV typing results by Sanger sequencing/BLAST and deep sequencing/taxonomic profiling are in bold.

<sup>d</sup> Hit result with the max bit score were identical to the Accession sequence.
